# Supplementary material for: STV11 encodes a sulphotransferase and confers durable resistance to rice stripe virus
Source: PubMed Central journal article supplement — Nat Commun. 2014 Sep 9;5:4768. doi: 10.1038/ncomms5768 (PMC4164775; doi:10.1038/ncomms5768), 2014-09-09
Supplement: ncomms5768-s1.pdf [file ncomms5768-s1.pdf]

## Supplementary Information

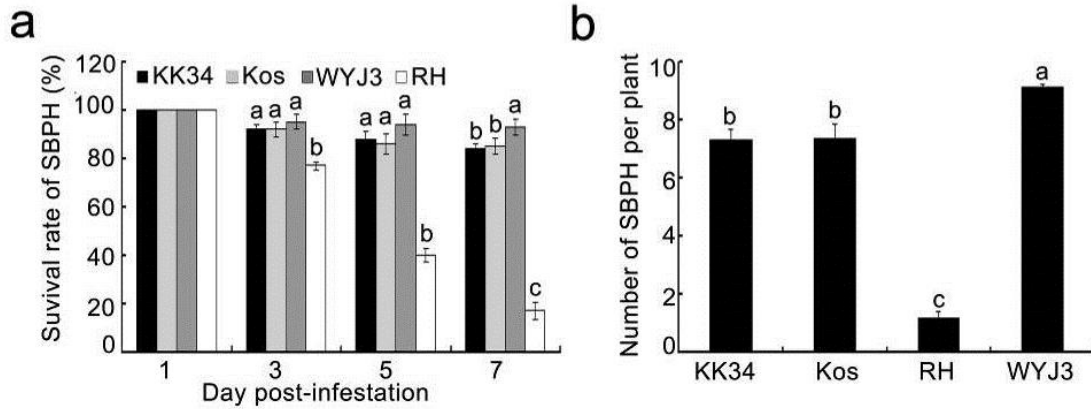

**Supplementary Figure 1.** KK34 and Kos are similarly susceptible to the insect vector SBPH. **(a)** Survival rates of SBPH on KK34 and Kos. **(b)** Feeding preferences of SBPH on KK34 and Kos. RH and WYJ3 were used as the resistant and susceptible controls, respectively. The error bars represent the s.e.m. Different letters on the top of each column indicate significant differences of  $P < 0.01$ , based on 3 replicates, by the Student's *t*-test.

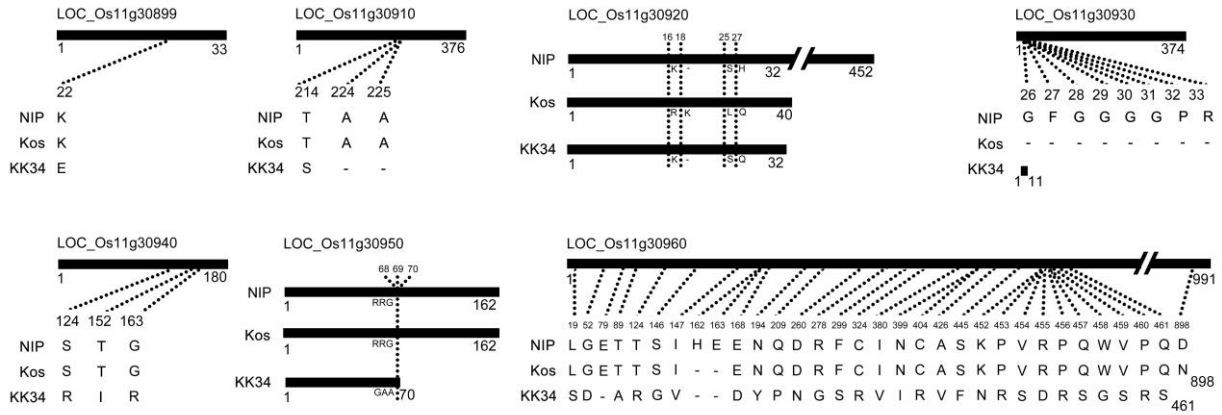

**Supplementary Figure 2.** Protein sequence comparison of the seven predicted gene products in the fine-mapped 39.2-kb region among Nipponbare (NIP), Kos and KK34. Amino acid changes are shown. One nucleotide substitution (position 929) and deletion (position 306) in *Loc\_Os11g30920* lead to premature termination in Kos and KK34, respectively. A 36 nucleotides substitution (position 1-36) in *Loc\_Os11g30930* leads to premature termination in KK34. One nucleotide deletion (position 201) in *Loc\_Os11g30950* leads to premature termination in KK34. One nucleotide insertion (position 4370) and 16 nucleotides deletion (position 1663-1678) in *Loc\_Os11g30960* result in truncated protein in Kos (898 amino acids) and KK34 (461 amino acids), respectively.

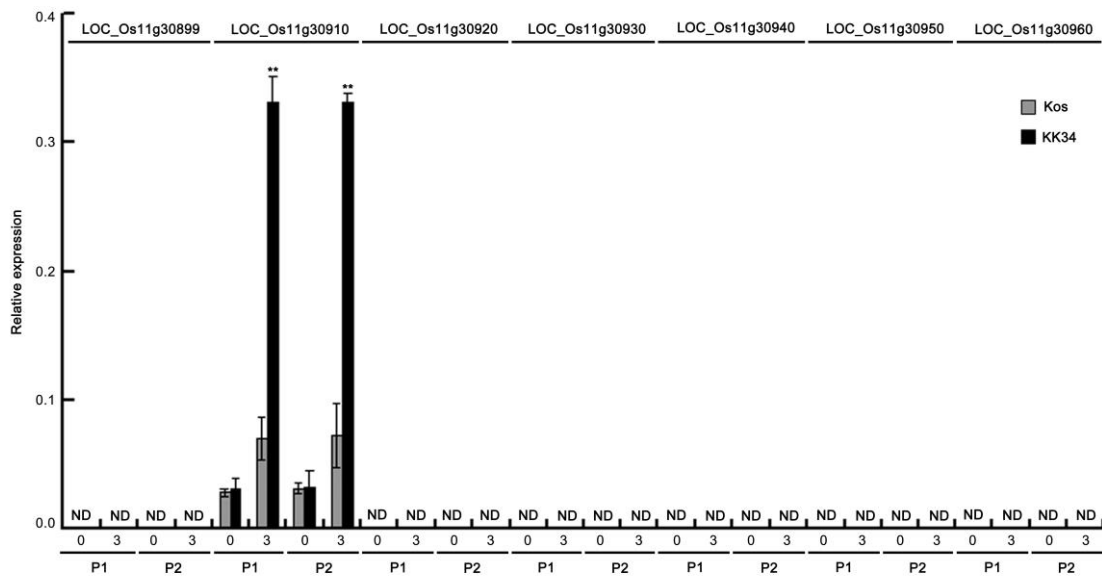

**Supplementary Figure 3.** Real time RT-PCR analysis of the seven predicted genes in the fine-mapped 39.2-kb region using Kos and KK34 seedling samples at 0 and 3 days post inoculation with RSV. The expression level is shown as the ratio to that of the rice *Ubiquitin-1* (Os06g0681400). Two pairs of primers (P1 and P2) were used to detect the expression of each gene. The mean  $\pm$  s.e.m was obtained from three technical repeats and three biological repeats. ND: not detectable. Error bars represent s.e.m; \*\* indicates significant differences between Kos and KK34 at  $P < 0.01$  by the Student's  $t$ -test ( $n = 3$ ).

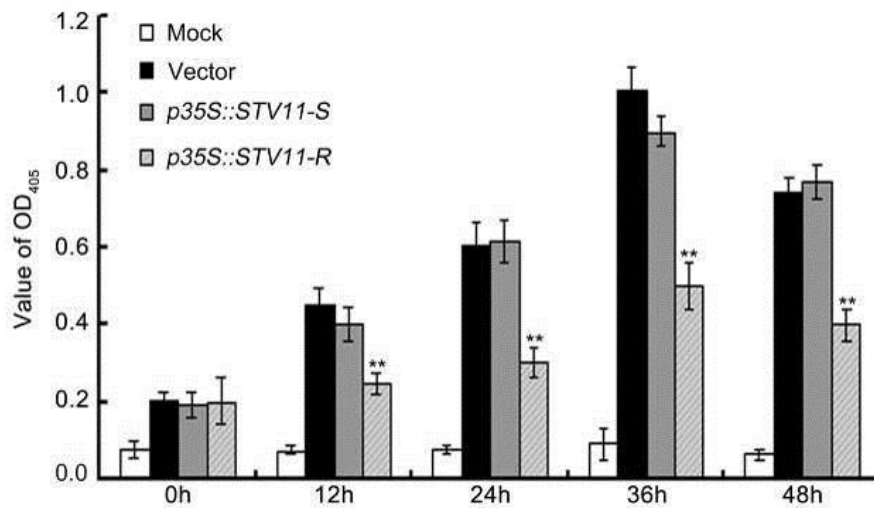

**Supplementary Figure 4.** RSV replication in NIP protoplasts transfected with the empty vector, p35S::STV11-S or p35S::STV11-R, together with RSV. Mock, the protoplasts not transfected with RSV. Data are shown as means  $\pm$  s.e.m. (n = 3). \*\* indicates significant differences at  $P < 0.01$  from the empty vector control, by the Student's *t*-test, based on 3 replicates.

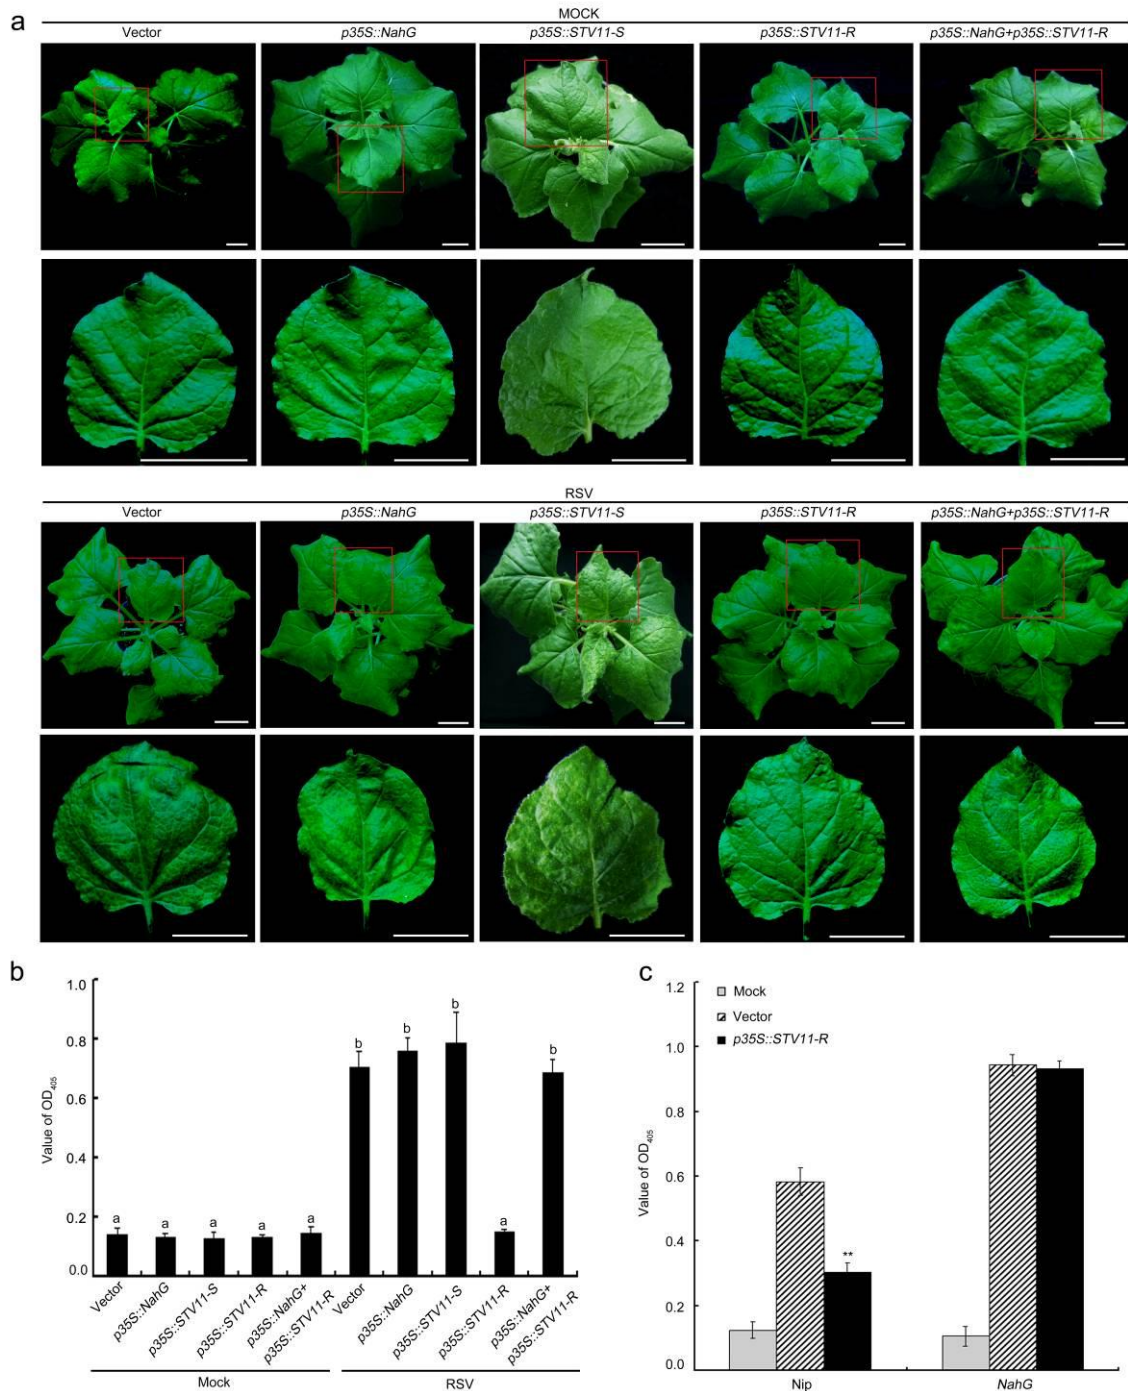

**Supplementary Figure 5.** The antagonistic effect of *NahG* expression on *STV11*-mediated RSV resistance in *N. benthamiana* and rice protoplasts. (a) Preantepenultimate leaves of 4-week-old *N. benthamiana* plants injected with *Agrobacterium* cells carrying the empty vector, p35S::NahG, p35S::STV11-S,

p35S::*STV11-R* or a mixture of p35S::*NahG* and p35S::*STV11-R*, were infected without (Mock, upper panel ) or with (lower panel) RSV. The chlorosis and yellowing symptoms in the systemic leaves were visible at 15 dpi. Scale bar, 2 cm. **(b)** ELISA assay showing replication of RSV in systemic leaves of *N. benthamiana* plants at 15 dpi. Data are shown as means  $\pm$  s.e.m. (n = 3). Different letters indicate significant differences at  $p < 0.01$  by the Student's *t*-test, based on 3 replicates. **(c)** The protoplasts were collected from Nipponbare (NIP) and transgenic Nipponbare plants carrying p35S::*NahG* at 16 h after infection by RSV. Mock, the protoplasts were not infected with RSV. Data are shown as means  $\pm$  s.e.m. (n = 3). \*\* indicates significant differences from the empty vector control at  $P < 0.01$  by the Student's *t*-test, based on 3 replicates.

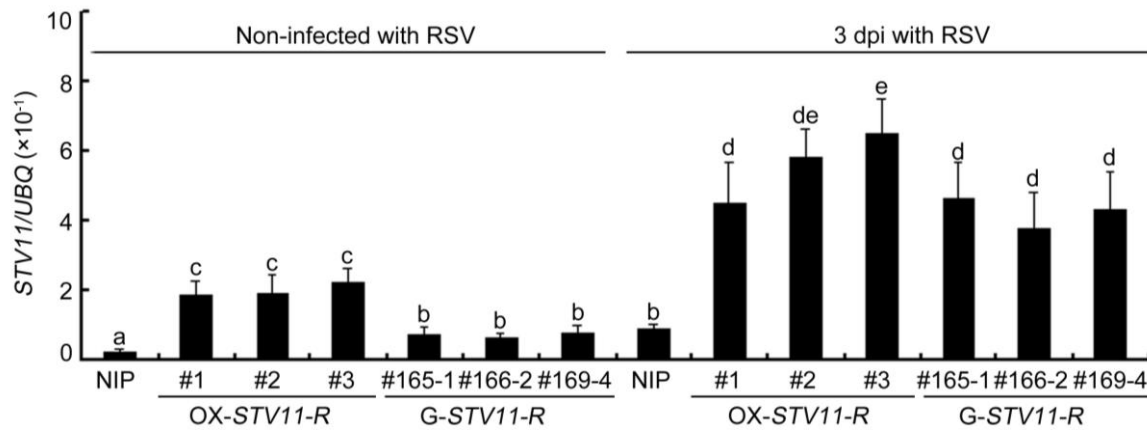

**Supplementary Figure 6.** RNA levels of *STV11* in transgenic lines. OX-*STV11-R*, transgenic lines over-expressing *STV11-R* driven by the maize *Ubiquitin-1* promoter; G-*STV11-R*, transgenic lines transformed with a genomic sequence of *STV11-R*. The expression level of *STV11* is shown as the ratio to that of rice *Ubiquitin-1* (Os06g0681400). The mean  $\pm$  s.e.m. was obtained from three repeats. Error bars represent s.e.m. Different letters on the top of each column indicate significant differences of  $P < 0.05$  by the Student's *t*-test. The increased expression of *STV11* in the OX-*STV11-R* plants might be due to the stress responsiveness of the maize *Ubiquitin* promoter<sup>1,2</sup>.

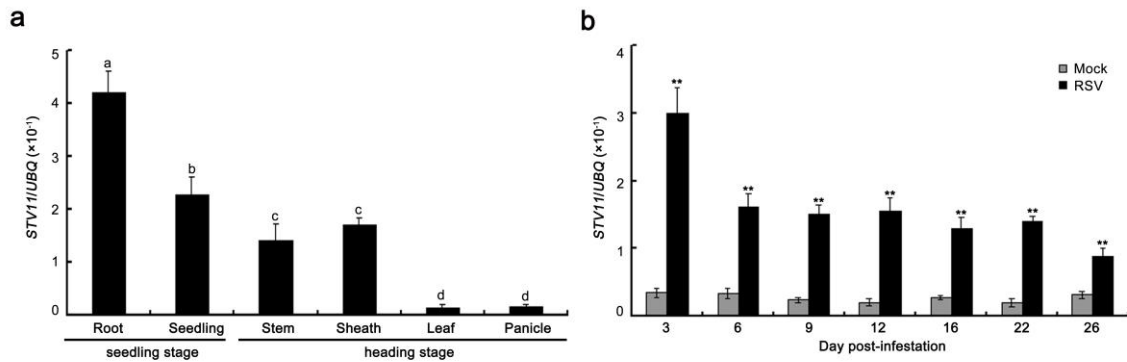

**Supplementary Figure 7.** Expression patterns of *STVII* in KK34. **(a)** Differential expression of *STVII* in different tissues at the seedling or heading stage. The expression level of *STVII* is shown as the ratio to that of rice *Ubiquitin-1* (Os06g0681400). The mean  $\pm$  s.e.m. was obtained from three technical repeats and three biological repeats. Error bars represent s.e.m. Different letters on the top of each column indicate significant differences at  $P < 0.05$  by the Student's *t*-test. **(b)** Induced expression of *STVII* by RSV infection. Mock, seedlings were infested with RSV-free SBPH. The expression level of *STVII* is shown as the ratio to that of rice *Ubiquitin-1* (Os06g0681400). The mean  $\pm$  s.e.m. was obtained from three technical repeats and three biological repeats. Error bars represent s.e.m. \*\* indicates significant differences from mock at  $P < 0.01$  by the Student's *t*-test.



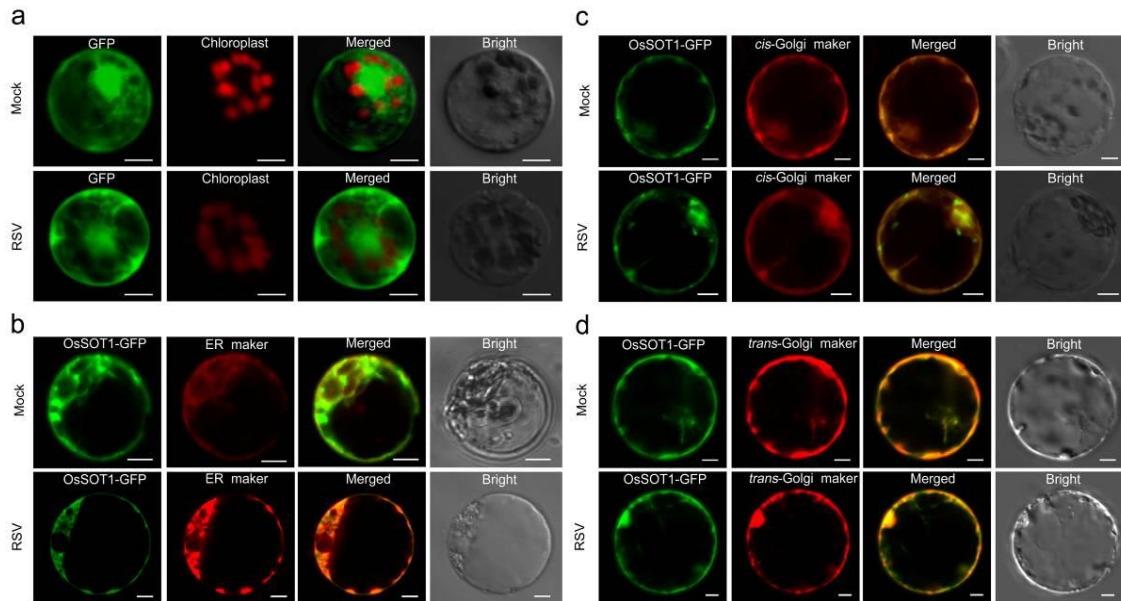

**Supplementary Figure 8.** Subcellular localization of OsSOT1 in rice leaf sheath protoplasts. **(a)** *p35S-GFP*. **(b)** ER marker mCherry-HDEL co-infected with the *pOsSOT1-GFP*. **(c)** *cis*-Golgi maker GmMan1–mCherry co-infected with *pOsSOT1-GFP*. **(d)** *trans*-Golgi marker ST–mCherry co-infected with *pOsSOT1-GFP*. Protoplasts were visualized 16 h after transfection with plasmids and RSV. Mock, no RSV infection. Scale bar, 5  $\mu\text{m}$ .

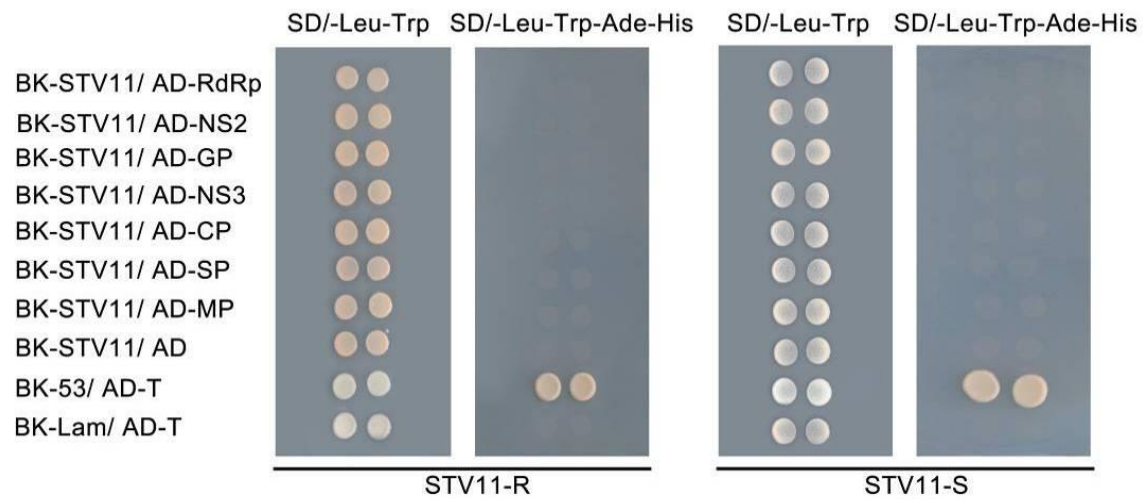

**Supplementary Figure 9.** OsSOT1 encoded by neither *STV11-R* nor *STV11-S* interacts with the RSV-encoded proteins in yeast two-hybrid assays. RdRp, RNA-dependent RNA polymerase; NS2, sense RSV RNA2; GP, glycoprotein; NS3, sense RSV RNA3; CP, coat protein; SP, disease-specific protein ; MP, movement protein. BK-STV11/AD, vector control; BK-53/AD-T, positive control; BKT7-Lam/AD-T, negative control.

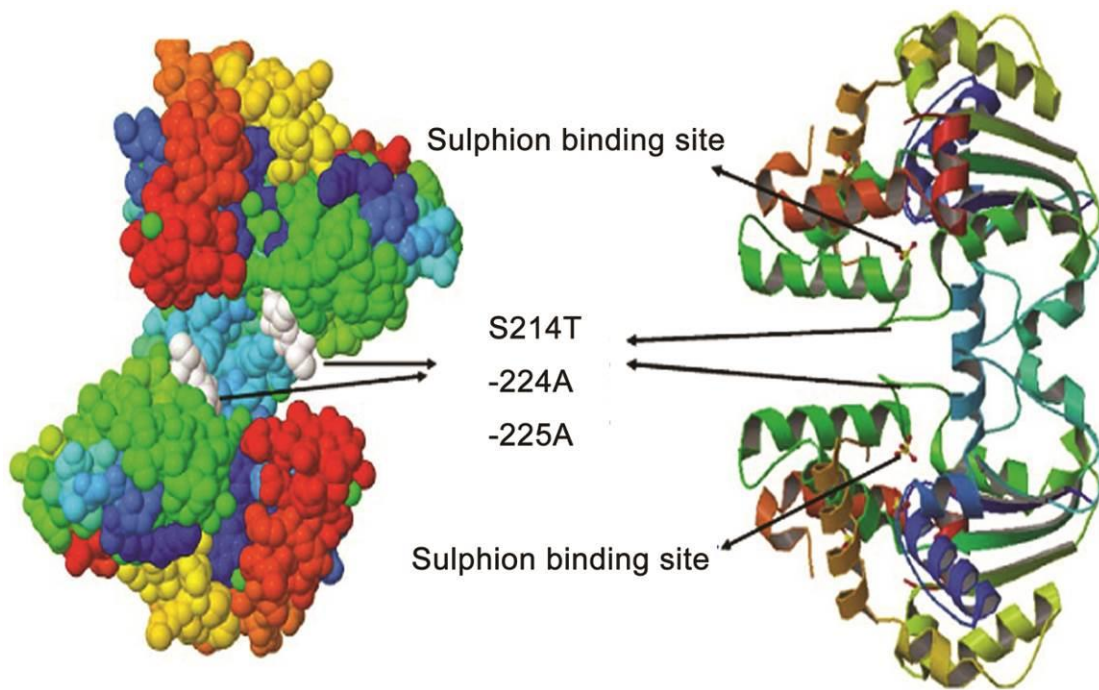

**Supplementary Figure 10.** Structural modeling of OsSOT1. The amino acid substitution (S214T) and the deletion of two amino acids (224A and 225A) are predicted to be in close proximity of the sulphion-binding site.

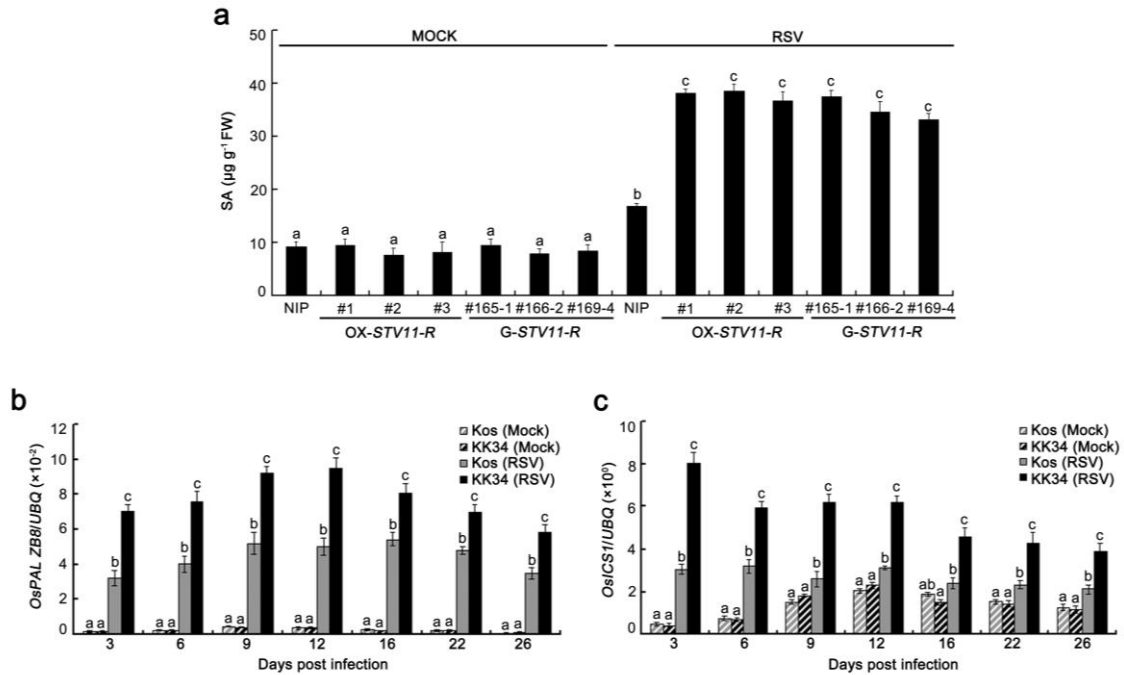

**Supplementary Figure 11.** RSV-induced SA accumulation and expression of SA biosynthetic genes. **(a)** SA accumulation is higher in transgenic lines over-expressing *STV11-R* driven by the maize *Ubiquitin-1* gene promoter and transformed with a genomic sequence of *STV11-R* than that in the susceptible Nipponbare (NIP) at 3 dpi. Error bars represent s.e.m., different letters on the top of each column indicate significant differences at  $P < 0.01$ , based on three replicates by the Student's  $t$ -test. **(b, c)** RSV infection induces the expression of SA biosynthetic genes. Mock, the seedlings were infested with RSV-free SBPH. The expression level is shown as the ratio with the rice *Ubiquitin-1* (Os06g0681400). Error bars represent s.e.m.. Different letters on the top of each column indicate significant differences at  $P < 0.05$  by the Student's  $t$ -test.

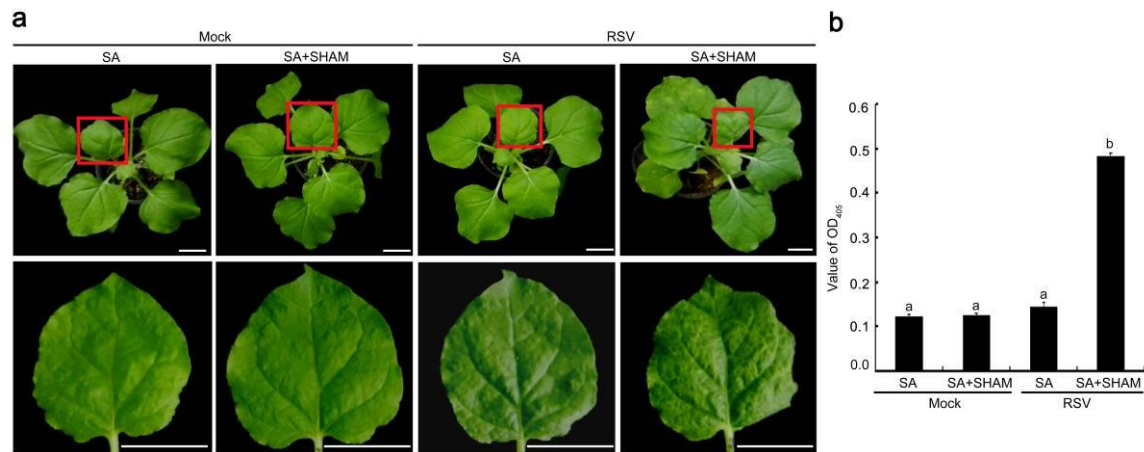

**Supplementary Figure 12.** SA treatment enhances RSV resistance in *N. benthamiana*. (a)

Three week-old *N. benthamiana* plants were sprayed with solutions containing 1 mM SA or a mix of 1 mM SA and 2 mM SHAM twice a day for 5 days before infection with RSV.

Pictures were taken 15 dpi. Mock, *N. benthamiana* plants not infected with RSV. Scale bar, 2 cm.

(b) ELISA assay showing replication of RSV in systemic leaves of *N.*

*benthamiana* plants 15 dpi. The error bars represent the s.e.m.. Different letters on the top

of each column indicate significant differences at  $P < 0.01$ , by the Student's *t*-test, based

on 3 replicates.

**Supplementary Table 1. Wild rice used in this study**

| Varieties | Species             | Subspecies | Accession No <sup>a</sup> | Origin           | Genotype |
|-----------|---------------------|------------|---------------------------|------------------|----------|
| ruf-KHM1  | <i>O. rufipogon</i> | Perennial  | 106332                    | Cambodia         | R        |
| ruf-KHM2  | <i>O. rufipogon</i> | Perennial  | 89231                     | Cambodia         | R        |
| ruf-IND1  | <i>O. rufipogon</i> | Perennial  | 80506                     | India            | S        |
| ruf-IND2  | <i>O. rufipogon</i> | Perennial  | 106110                    | India            | R        |
| ruf-INA1  | <i>O. rufipogon</i> | Perennial  | 81978                     | Indonesia        | R        |
| ruf-MMR   | <i>O. rufipogon</i> | Perennial  | 80742                     | Myanmar          | R        |
| ruf-PNG1  | <i>O. rufipogon</i> | Perennial  | 106283                    | Papua New Guinea | R        |
| ruf-PNG2  | <i>O. rufipogon</i> | Perennial  | 106268                    | Papua New Guinea | R        |
| ruf-CHN1  | <i>O. rufipogon</i> | Perennial  | 81974                     | Thailand         | R'       |
| ruf-CHN2  | <i>O. rufipogon</i> | Perennial  | DX01                      | China            | S        |
| ruf-CHN3  | <i>O. rufipogon</i> | Perennial  | TY01                      | China            | S        |
| ruf-CHN4  | <i>O. rufipogon</i> | Perennial  | HN02                      | China            | S        |
| ruf-CHN5  | <i>O. rufipogon</i> | Perennial  | HN1                       | China            | S        |
| ruf-CHN6  | <i>O. rufipogon</i> | Perennial  | WN1                       | China            | R        |
| ruf-CHN7  | <i>O. rufipogon</i> | Perennial  | WN2                       | China            | R        |
| ruf-CHN8  | <i>O. rufipogon</i> | Perennial  | ZZ2                       | China            | S        |
| ruf-CHN9  | <i>O. rufipogon</i> | Perennial  | DX2                       | China            | S        |
| ruf-CHN10 | <i>O. rufipogon</i> | Perennial  | GZ1                       | China            | S        |
| ruf-CHN11 | <i>O. rufipogon</i> | Perennial  | GZ2                       | China            | S        |
| ruf-CHN12 | <i>O. rufipogon</i> | Perennial  | BS2                       | China            | S        |
| ruf-CHN13 | <i>O. nivara</i>    | Annual     | 80545                     | India            | R        |
| niv-LA1   | <i>O. nivara</i>    | Annual     | 106151                    | Laos             | R        |
| niv-LA2   | <i>O. nivara</i>    | Annual     | 106154                    | Laos             | R'       |
| niv-MMR   | <i>O. nivara</i>    | Annual     | 80725                     | Myanmar          | R        |
| niv-NPL   | <i>O. nivara</i>    | Annual     | 105703                    | Nepal            | R        |
| niv-TH    | <i>O. nivara</i>    | Annual     | 105789                    | Thailand         | R        |
| niv-KHM1  | <i>O. nivara</i>    | Annual     | 105724                    | Cambodia         | H4       |
| niv-IND1  | <i>O. nivara</i>    | Annual     | 81861                     | India            | H5       |
| niv-IND2  | <i>O. nivara</i>    | Annual     | 86474                     | India            | H6       |
| niv-IND3  | <i>O. nivara</i>    | Annual     | 80559                     | India            | H7       |

<sup>a</sup> The germplasms from Chinese Crop Germplasm Bank.

**Supplementary Table 2.** Correlation between *STVII* alleles and RSV resistance

| Varieties      | Genotype | Phenotype | Polymorphic nucleotide |     |     |     |     |     |     |     |     |
|----------------|----------|-----------|------------------------|-----|-----|-----|-----|-----|-----|-----|-----|
|                |          |           | 150                    | 161 | 640 | 670 | 671 | 672 | 673 | 674 | 675 |
| KK34           | R        | R         | G                      | C   | T   | -   | -   | -   | -   | -   | -   |
| Kasalath       | R        | R         | G                      | C   | T   | -   | -   | -   | -   | -   | -   |
| IR36           | R        | R         | G                      | C   | T   | -   | -   | -   | -   | -   | -   |
| N22            | R        | R         | G                      | C   | T   | -   | -   | -   | -   | -   | -   |
| Habataki       | R        | R         | G                      | C   | T   | -   | -   | -   | -   | -   | -   |
| Nanjing11      | R        | R         | G                      | C   | T   | -   | -   | -   | -   | -   | -   |
| Lianjing4      | R        | R         | G                      | C   | T   | -   | -   | -   | -   | -   | -   |
| Xudao3         | R        | R         | G                      | C   | T   | -   | -   | -   | -   | -   | -   |
| Yangdao8       | R        | R         | G                      | C   | T   | -   | -   | -   | -   | -   | -   |
| Xiaoxiangdao   | R        | R         | G                      | C   | T   | -   | -   | -   | -   | -   | -   |
| Magu           | R        | R         | G                      | C   | T   | -   | -   | -   | -   | -   | -   |
| Zaozaohe       | R        | R         | G                      | C   | T   | -   | -   | -   | -   | -   | -   |
| Shilixiang     | R        | R         | G                      | C   | T   | -   | -   | -   | -   | -   | -   |
| Guangchangai   | R        | R         | G                      | C   | T   | -   | -   | -   | -   | -   | -   |
| Sihuisanchaoqi | R        | R         | G                      | C   | T   | -   | -   | -   | -   | -   | -   |
| Qiyuexian      | R        | R         | G                      | C   | T   | -   | -   | -   | -   | -   | -   |
| Teqing         | R        | R         | G                      | C   | T   | -   | -   | -   | -   | -   | -   |
| Qiuqianbai     | R        | R         | G                      | C   | T   | -   | -   | -   | -   | -   | -   |
| Zhendao88      | R        | R         | G                      | C   | T   | -   | -   | -   | -   | -   | -   |
| Lianjing3      | R        | R         | G                      | C   | T   | -   | -   | -   | -   | -   | -   |
| Nanjing44      | R        | R         | G                      | C   | T   | -   | -   | -   | -   | -   | -   |
| Yangjing4227   | R        | R         | G                      | C   | T   | -   | -   | -   | -   | -   | -   |
| Zhendao10      | R        | R         | G                      | C   | T   | -   | -   | -   | -   | -   | -   |
| Yangjing9538   | R        | R         | G                      | C   | T   | -   | -   | -   | -   | -   | -   |
| Akenohoshi     | R        | R         | G                      | C   | T   | -   | -   | -   | -   | -   | -   |
| Norin 300      | R        | R         | G                      | C   | T   | -   | -   | -   | -   | -   | -   |
| Laijing        | R        | R         | G                      | C   | T   | -   | -   | -   | -   | -   | -   |
| Shuiyuan251    | R        | R         | G                      | C   | T   | -   | -   | -   | -   | -   | -   |
| T1             | R        | R         | G                      | C   | T   | -   | -   | -   | -   | -   | -   |
| BJ 1           | R        | R         | G                      | C   | T   | -   | -   | -   | -   | -   | -   |
| Padi Boenor    | R        | R         | G                      | C   | T   | -   | -   | -   | -   | -   | -   |
| Gie 57         | R        | R         | G                      | C   | T   | -   | -   | -   | -   | -   | -   |
| RTS13          | R        | R         | G                      | C   | T   | -   | -   | -   | -   | -   | -   |
| Tam Cau-10A    | R        | R         | G                      | C   | T   | -   | -   | -   | -   | -   | -   |
| SAMPONG P 9    | R        | R         | G                      | C   | T   | -   | -   | -   | -   | -   | -   |
| DV85           | R        | R         | G                      | C   | T   | -   | -   | -   | -   | -   | -   |
| Dhala Shaitta  | R        | R         | G                      | C   | T   | -   | -   | -   | -   | -   | -   |
| DV1            | R        | R         | G                      | C   | T   | -   | -   | -   | -   | -   | -   |

| Varieties          | Genotype | Phenotype | Polymorphic nucleotide  |          |                                 |   |   |   |   |   |   |
|--------------------|----------|-----------|-------------------------|----------|---------------------------------|---|---|---|---|---|---|
| Shundetanghe       | R'       | R         | G                       | T        | T                               | - | - | - | - | - | - |
| Wenxiangnuo        | R'       | R         | G                       | T        | T                               | - | - | - | - | - | - |
| Haolai             | R'       | R         | G                       | T        | T                               | - | - | - | - | - | - |
| CO 18              | R'       | R         | G                       | T        | T                               | - | - | - | - | - | - |
| Taducan            | R'       | R         | G                       | T        | T                               | - | - | - | - | - | - |
| Khao Dawk Mali 105 | R'       | R         | G                       | T        | T                               | - | - | - | - | - | - |
| TD25               | R'       | R         | G                       | T        | T                               | - | - | - | - | - | - |
| Patnai 23          | S        | R         | T                       | C        | A                               | G | C | G | G | C | G |
| JC92               | S        | R         | T                       | C        | A                               | G | C | G | G | C | G |
| Longtefu           | S        | S         | T                       | C        | A                               | G | C | G | G | C | G |
| Guangluai          | S        | S         | T                       | C        | A                               | G | C | G | G | C | G |
| Koshihikari        | S        | S         | T                       | C        | A                               | G | C | G | G | C | G |
| Nipponbare         | S        | S         | T                       | C        | A                               | G | C | G | G | C | G |
| Neken2             | S        | S         | T                       | C        | A                               | G | C | G | G | C | G |
| Akihikari          | S        | S         | T                       | C        | A                               | G | C | G | G | C | G |
| Balilla            | S        | S         | T                       | C        | A                               | G | C | G | G | C | G |
| USSR5              | S        | S         | T                       | C        | A                               | G | C | G | G | C | G |
| Wuyujing3          | S        | S         | T                       | C        | A                               | G | C | G | G | C | G |
| Dongdao            | S        | S         | T                       | C        | A                               | G | C | G | G | C | G |
| Dajinxian          | S        | S         | T                       | C        | A                               | G | C | G | G | C | G |
| Lucaihao           | S        | S         | T                       | C        | A                               | G | C | G | G | C | G |
| Zaohuangdao        | S        | S         | T                       | C        | A                               | G | C | G | G | C | G |
| Sanbaili           | S        | S         | T                       | C        | A                               | G | C | G | G | C | G |
| Jinnanfeng         | S        | S         | T                       | C        | A                               | G | C | G | G | C | G |
| Wufujing           | S        | S         | T                       | C        | A                               | G | C | G | G | C | G |
| Wyunjing8          | S        | S         | T                       | C        | A                               | G | C | G | G | C | G |
| Wuxiangjing1       | S        | S         | T                       | C        | A                               | G | C | G | G | C | G |
| Xiushui48          | S        | S         | T                       | C        | A                               | G | C | G | G | C | G |
| Nanjing35          | S        | S         | T                       | C        | A                               | G | C | G | G | C | G |
| Wyunjing7          | S        | S         | T                       | C        | A                               | G | C | G | G | C | G |
| Changnongjing1     | S        | S         | T                       | C        | A                               | G | C | G | G | C | G |
| Wuxiangjing14      | S        | S         | T                       | C        | A                               | G | C | G | G | C | G |
| Baipixiaodao       | S        | S         | T                       | C        | A                               | G | C | G | G | C | G |
| Mudanjing2         | S        | S         | T                       | C        | A                               | G | C | G | G | C | G |
|                    |          |           | $R=0.95$                | $R=0.05$ | $R=0.95, P=2.2 \times 10^{-16}$ |   |   |   |   |   |   |
|                    |          |           | $P=2.2 \times 10^{-16}$ | $P=0.65$ |                                 |   |   |   |   |   |   |



**Supplementary Table 3.** Cultivars derived from Modan or Kanto 72

| Cultivars    | Genotype | Phenotype <sup>#</sup> | Resistance donor parent | Subspecies | Origin |
|--------------|----------|------------------------|-------------------------|------------|--------|
| Modan        | R        | R                      | -                       | indica     | India  |
| Kanto 72     | R        | R                      | -                       | indica     | Japan  |
| Asanohikari  | R        | R                      | Modan                   | japonica   | Japan  |
| Chugoku 31   | R        | R                      | Modan                   | japonica   | Japan  |
| Aichi97      | R        | R                      | Modan                   | japonica   | Japan  |
| Chugoku 40   | R        | R                      | Kanto 72                | japonica   | Japan  |
| Norin 300    | R        | R                      | Modan                   | japonica   | Japan  |
| Norin 24     | R        | R                      | Modan                   | japonica   | Japan  |
| Zhendao88    | R        | R                      | Modan                   | japonica   | China  |
| Nanjing44    | R        | R                      | Modan                   | japonica   | China  |
| Yangjing4227 | R        | R                      | Modan                   | japonica   | China  |
| Zhendao10    | R        | R                      | Modan                   | japonica   | China  |
| Xudao3       | R        | R                      | Modan                   | japonica   | China  |
| Lianjing4    | R        | R                      | Modan                   | japonica   | China  |
| Yangjing9538 | R        | R                      | Modan                   | japonica   | China  |

<sup>#</sup> The criteria for phenotyping RSV resistance were described by Zhang et al. 2011<sup>8</sup>.

**Supplementary Table 4.** List of the primers used for vectors construction and sequence and gene expression.

| Description            | Primer name              | Accession/Locus ID     | Forward primer sequence (5'-3')     | Reverse primer sequence (5'-3')       | Recombinanat site | Reference  |
|------------------------|--------------------------|------------------------|-------------------------------------|---------------------------------------|-------------------|------------|
| Vector construction    | UBI- <i>STV11-R</i>      | LOC_Os11g30910         | TTGGTACCAGTCCAGAGAGGCAGAGG          | TTGGATCCAGCTTGACACATGCGATC            | -                 | This study |
|                        | G- <i>STV11-R</i>        | LOC_Os11g30910         | ccatgattacgaattcCATCACACAAAGAAGAGAC | taccgagctcgaattcTAGATACTAGCTTGACACA   | <i>EcoR</i> I     | This study |
|                        | p35S- <i>STV11-R (S)</i> | LOC_Os11g30910         | TTGGTACCAGTCCAGAGAGGCAGAGG          | TTGGATCCAGCTTGACACATGCGATC            | -                 | This study |
|                        | pOs <i>SOT1</i> -GFP     | LOC_Os11g30910         | ATGGCCCCAACCTCCAGC                  | TTCGGAGTCGCCGGCAG                     | -                 | This study |
|                        | GEX- <i>STV11</i>        | LOC_Os11g30910         | CGCGGATCCATGGCCCCAACCTCCAGC         | ATAAGAATGCGGCCGCTCATTTCGGAGTCGCCGGCAG | -                 | This study |
| Sequence               | Se- <i>STV11</i>         | LOC_Os11g30910         | TGAGCGACAATACTCCAGA                 | AAGATAGATACTAGCTTGACACAT              | -                 | This study |
|                        | S30899                   | LOC_Os11g30899         | AAGTAACCAAGAACTTGGAACG              | CAGCCTCTTTATCCCCTCAC                  | -                 | This study |
|                        | S30920-1                 | LOC_Os11g30920         | GTGCCCTTCATTCCCTT                   | GCTCCTTTGGGTGGGTT                     | -                 | This study |
|                        | S30920-2                 | LOC_Os11g30920         | ATAGGAACCCACCCAAAG                  | TCACAGACCCACCATTCA                    | -                 | This study |
|                        | S30930-1                 | LOC_Os11g30930         | TGCCTCACTTCAGTCCTT                  | TGCTCCGAATGTTGTTC                     | -                 | This study |
|                        | S30930-2                 | LOC_Os11g30930         | TAGAAACAACATTCGGAGCA                | TCAACGGGCAGAGCAAGG                    | -                 | This study |
|                        | S30930-3                 | LOC_Os11g30930         | GGGTGAACATTTACAGGC                  | GATGGAGGGACACGAACT                    | -                 | This study |
|                        | S30930-4                 | LOC_Os11g30930         | GCAGTTCGTGTCCCTCCA                  | ACGGCGATTCTCCCTTGA                    | -                 | This study |
|                        | S30940-1                 | LOC_Os11g30940         | CCATGACGCCAAGTGATCT                 | GCTAACCACGGTGCCAGAC                   | -                 | This study |
|                        | S30940-2                 | LOC_Os11g30940         | GCATTGCTTAGTCTAACGC                 | TGTTTAGTACTTGAGCCTCG                  | -                 | This study |
|                        | S30950-1                 | LOC_Os11g30950         | CATGTATGCGACGCCTCAT                 | CAGTCTAACTCACCCACTTCTT                | -                 | This study |
|                        | S30960-1                 | LOC_Os11g30960         | CACGAAGAAAAGCAAAGCG                 | GACAATGACGACGATGAGG                   | -                 | This study |
|                        | S30960-2                 | LOC_Os11g30960         | ATGTTCTCATACTTGCCACC                | TTCTCACTGGCGTAGTAGGAT                 | -                 | This study |
|                        | S30960-3                 | LOC_Os11g30960         | ATTAGTTCTGGCGGATGTCTG               | GGCTACTGAGCGGTGGTT                    | -                 | This study |
|                        | Gene expression          | qRT- <i>STV11 (P1)</i> | LOC_Os11g30910                      | GCAATACGGCGGCTACT                     | GATGGCGAAGGTGGACT | -          |
| qRT- <i>STV11 (P2)</i> |                          | LOC_Os11g30910         | ACATCCCCTACTCCCTCTCG                | TGGTCGTTGTGACACCCTTC                  | -                 | This study |

Continued

| Description             | Primer name | Accession/Locus ID | Forward primer sequence (5'-3') | Reverse primer sequence (5'-3') | Recombinant site | Reference  |
|-------------------------|-------------|--------------------|---------------------------------|---------------------------------|------------------|------------|
|                         | 899-P1      | LOC_Os11g30899     | GCGATGACAGCTGAGAC               | CATCTACCAGCGATGGA               | -                | This study |
|                         | 899-P2      | LOC_Os11g30899     | TGGCGATGACAGCTGAGACC            | GTCGGCTACGGATCCACCTC            | -                | This study |
|                         | 920-P1      | LOC_Os11g30920     | AGAAGGGCATCTACAACG              | CACGAGGCGAATATCAAG              | -                | This study |
|                         | 920-P2      | LOC_Os11g30920     | CTTCTTTGCCTCACTTCA              | TAGCCTCTCTTTGTTCAT              | -                | This study |
|                         | 930-P1      | LOC_Os11g30930     | TGGGTTCTGGGGTTTCT               | ATTCAGTCTCGGGCACA               | -                | This study |
|                         | 930-P2      | LOC_Os11g30930     | TGACAGCGATCTATGGTTG             | AATCTCTTGCCTAAGCCTC             | -                | This study |
|                         | 940-P1      | LOC_Os11g30940     | GAAGGTTCCGCGAAGGAGA             | ACCCCATTTGTTGCCAGTC             | -                | This study |
|                         | 940-P2      | LOC_Os11g30940     | AAGGAGATAATGCCAGGAA             | ACGCACATAGTATCGCTTG             | -                | This study |
|                         | 950-P1      | LOC_Os11g30950     | CTGTGGGGTTGGGTGTTA              | ACGACCTTGTGTCTTTCT              | -                | This study |
|                         | 950-P2      | LOC_Os11g30950     | CCAGCCAAAACCCCAATA              | ACGGCCCAGAAGACACAGT             | -                | This study |
|                         | 960-P1      | LOC_Os11g30960     | ACGACATCCGCCAGAACT              | TTGTCAACCCTTCCCATT              | -                | This study |
|                         | 960-P2      | LOC_Os11g30960     | TCTATGTTTCGATTGTCC              | TTCATACTCAATATCCGA              | -                | This study |
| qRT- <i>Ubiquitin-1</i> |             | Os06g0681400       | GTGGTGGCCAGTAAGTCCTC            | GGACACAATGATTAGGGATCA           | -                | 3          |
| qRT- <i>RSVCP</i>       |             | X53563.1           | CTAGTCATCTGCACCTTCT             | CCATGCCAGAGGGTAAGAAG            | -                | This study |
| qRT- <i>OsPAL ZB8</i>   |             | Os02g0626100       | CTCGCCGTCCACTCCTTG              | GCTCGGCTGCGTATTCCT              | -                | 4          |
| qRT- <i>OsICS1</i>      |             | Os09g0361500       | TATGGTGCTATCCGCTTCGAT           | CGAGAACCGAGCTCTCTTCAA           | -                | 5          |

## Supplementary References

1. Takimoto, I, Christensen, A.H., Quail, P.H., Uchimiya, H. & Toki S. Non-systemic expression of a stress-responsive maize *polyubiquitin* gene (*Ubi-1*) in transgenic rice plants. *Plant Mol. Biol.* **26**:1007-1012 (1994).
2. Cornejo, M.J., Luth, D., Blankenship, K.M., Anderson, O.D & Blechl, A.E. Activity of a maize *ubiquitin* promoter in transgenic rice. *Plant Mol. Biol.* **23**:567-81 (1993).
3. Shimono, M. et al. Rice WRKY45 plays a crucial role in benzothiadiazole-inducible blast resistance. *The Plant Cell* **19**, 2064-2076 (2007).
4. Fang, C. X. et al. UV-induced differential gene expression in rice cultivars analyzed by SSH. *Plant Growth Regul.* **59**, 245-253 (2009).
5. Du, B. et al. Identification and characterization of *Bph14*, a gene conferring resistance to brown planthopper in rice. *Proc. Natl. Acad. Sci. USA* **106**, 22163-22168 (2009).
